# Supplementary material for: Comparative Analysis of Human Tissue Interactomes Reveals Factors Leading to Tissue-Specific Manifestation of Hereditary Diseases
Source: PubMed Central journal article supplement (PMC4055280; doi:10.1371/journal.pcbi.1003632), 2014-06-12

**Figure S3: Transcript levels and PPI degrees are correlated in all 16 tissues.**

**A.** Binned expression data: Each box-plot diagram shows the quartiles (25%, 50% and 75%) of the sorted PPI-degree values (Y axis) in each RPKM bin (X axis). The Spearman correlations of the median values were above 0.91 and statistically significant ( $p < 2.4 \times 10^{-4}$ ) in all tissues.

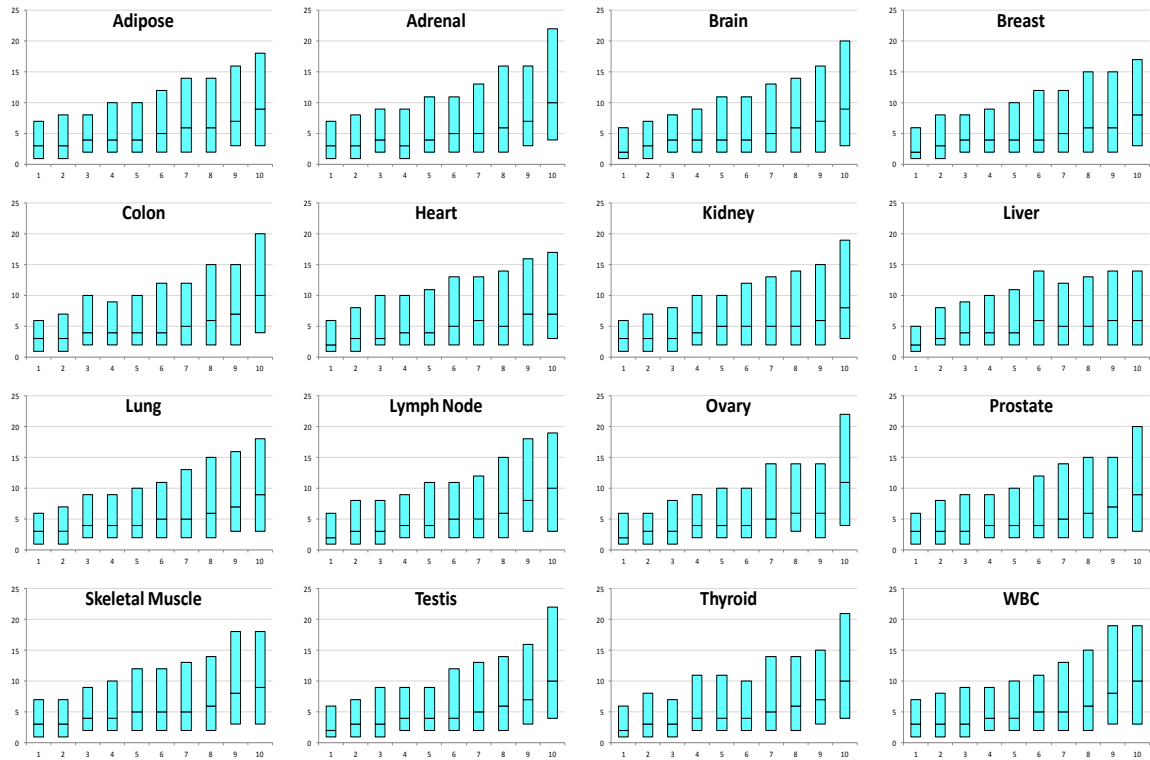

**B.** No binning of expression data: Each scatter plot shows the log2 RPKM values (X-axis) and the PPI-degree values (Y axis) for a specific tissue. The Spearman correlations were above 0.2 for 14 out of 16 tissues and statistically significant ( $p < 2.97 \times 10^{-18}$ ) in all tissues. Correlations and p-values for each tissue were as follows:

Adipose 0.23,  $p < 8.13 \times 10^{-80}$ ; Adrenal 0.23  $p < 9.65 \times 10^{-87}$ ; Brain 0.22  $p < 1.57 \times 10^{-78}$ ; Breast 0.20,  $p < 7.47 \times 10^{-62}$ ; Colon 0.22,  $p < 7.07 \times 10^{-76}$ ; Heart 0.18,  $p < 2.46 \times 10^{-49}$ ; Kidney 0.19,  $p < 1.61 \times 10^{-60}$ ; Liver 0.11,  $p < 2.97 \times 10^{-18}$ ; Lung 0.22,  $p < 2.41 \times 10^{-79}$ ; Lymph Node 0.23,  $p < 8.17 \times 10^{-89}$ ; Skeletal Muscle 0.21,  $p < 1.91 \times 10^{-63}$ ; Ovary 0.25,  $p < 4.57 \times 10^{-105}$ ; Prostate 0.22,  $p < 5.09 \times 10^{-83}$ ; Testis 0.25,  $p < 9.19 \times 10^{-109}$ ; Thyroid 0.23,  $p < 5.72 \times 10^{-88}$ ; WBC 0.20,  $p < 2.65 \times 10^{-30}$ .

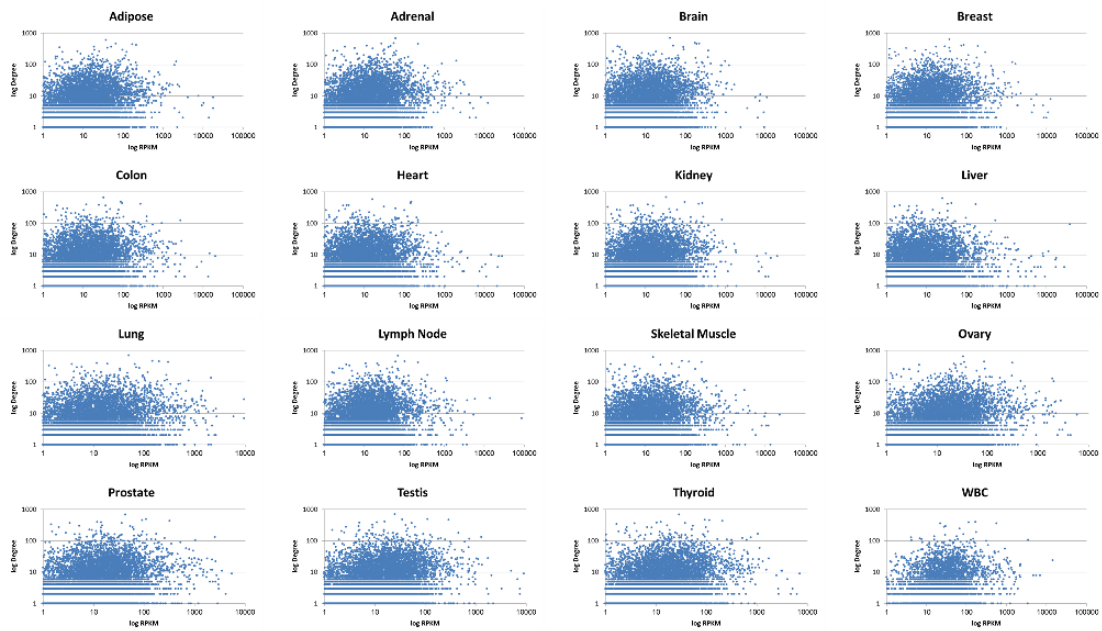

Supplement: pcbi.1003632.s003.pdf [file pcbi.1003632.s003.pdf]
