# Supplementary material for: Comparative Analysis of Human Tissue Interactomes Reveals Factors Leading to Tissue-Specific Manifestation of Hereditary Diseases
Source: PubMed Central journal article supplement (PMC4055280; doi:10.1371/journal.pcbi.1003632), 2014-06-12

**Figure S4: The diversity across tissues in transcript levels and in genes' PPI partners.**

- A.** A heat map showing the diversity in RPKM expression levels. Each row represents a gene ( $g$ ), each column represents a tissue ( $t$ ), and each entry ( $g,t$ ) represents the rank of the RPKM level of the gene  $g$  in tissue  $t$ . The ranking is in decreasing order of expression, such that the most highly expressed gene is ranked 1. The ranking is from blue to gray, white entries represent non-expressing tissues.
- B.** The diversity in PPI partners of genes across tissues. Each row represents a gene and the percentage of its PPI partners that are expressed in 1-3 tissues (orange), 4-13 tissues (blue) and 14-16 tissues (grey).

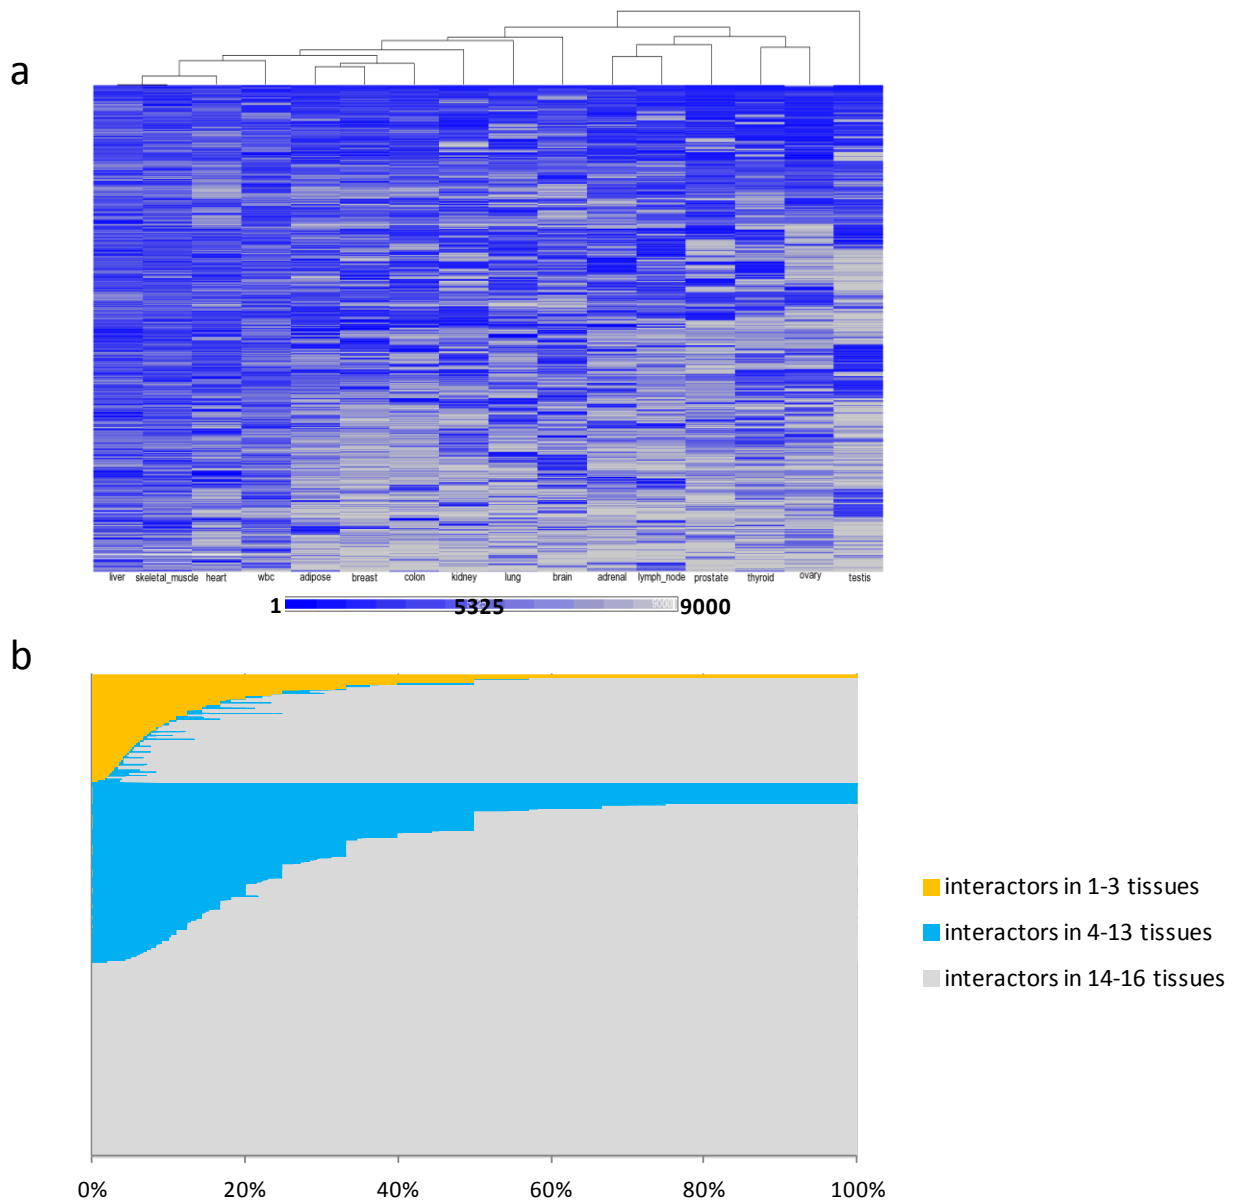

Supplement: pcbi.1003632.s004.pdf [file pcbi.1003632.s004.pdf]
