# Supplementary material for: Comparative Analysis of Human Tissue Interactomes Reveals Factors Leading to Tissue-Specific Manifestation of Hereditary Diseases
Source: PubMed Central journal article supplement (PMC4055280; doi:10.1371/journal.pcbi.1003632), 2014-06-12

**Figure S6: The PPI degrees of causal genes across tissues.**

- A. The PPI degree distribution of causal genes across tissues is scale-free like. Similarly to other interactome genes, most causal genes have at most five PPI partners.
- B. Causal genes tend to have higher PPI degree in their disease tissues relative to other tissues (42%, randomization test  $p < 10^{-4}$ ). The box-plot diagram shows the quartiles (25%, 50% and 75%) of the median PPI degree of disease genes; for each gene only tissues expressing the gene were considered.

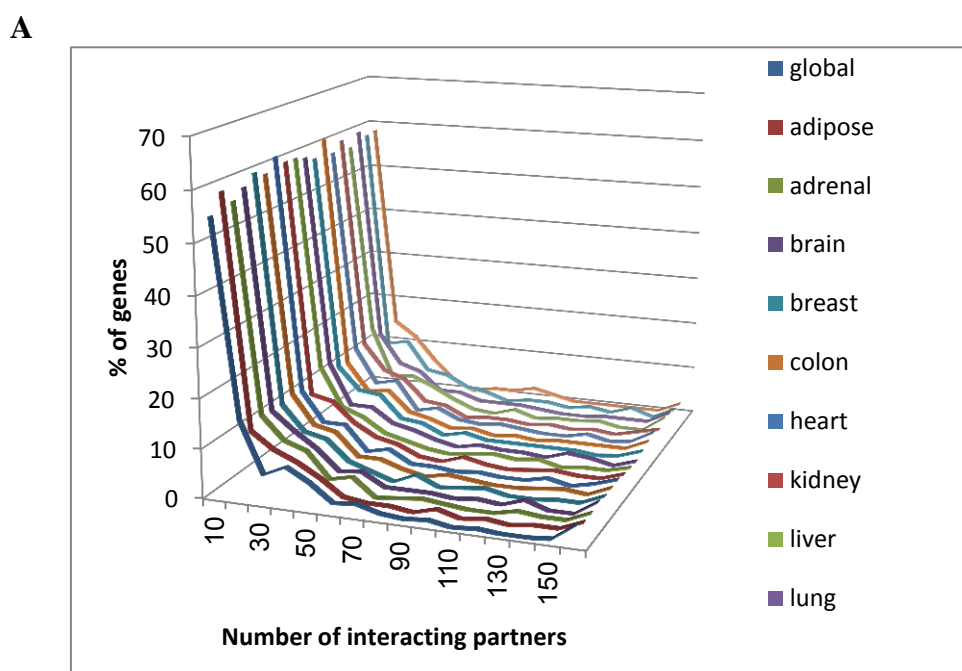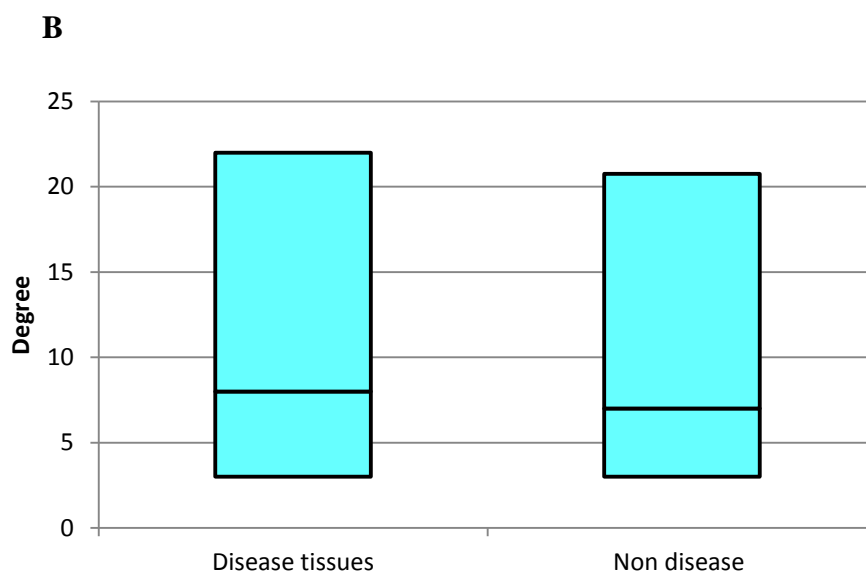

Supplement: pcbi.1003632.s006.pdf [file pcbi.1003632.s006.pdf]
