# Supplementary material for: Comparative Analysis of Human Tissue Interactomes Reveals Factors Leading to Tissue-Specific Manifestation of Hereditary Diseases
Source: PubMed Central journal article supplement (PMC4055280; doi:10.1371/journal.pcbi.1003632), 2014-06-12

**Figure S7: Causal genes are significantly enriched in genes involved in tissue-specific PPIs.** Each pie chart describes the fraction of genes with tissue-specific PPI numbers ranging from 0 to 5 and above. Notably, 54% of the hereditary disease genes have at least one tissue-specific PPI, relative to only 42% of all interactome genes ( $p=8.8 \times 10^{-5}$ , Fisher exact test).

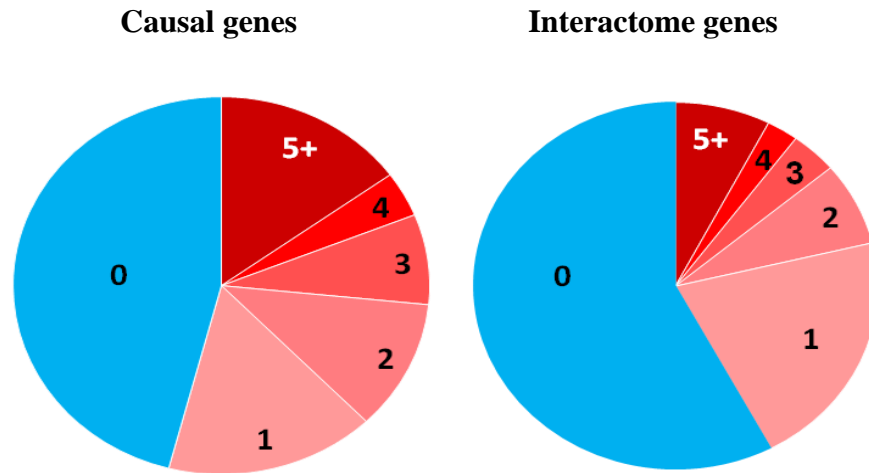

Supplement: pcbi.1003632.s007.pdf [file pcbi.1003632.s007.pdf]
