# Supplementary material for: Comparative Analysis of Human Tissue Interactomes Reveals Factors Leading to Tissue-Specific Manifestation of Hereditary Diseases
Source: PubMed Central journal article supplement (PMC4055280; doi:10.1371/journal.pcbi.1003632), 2014-06-12
Supplement: pcbi.1003632.s009.pdf [file pcbi.1003632.s009.pdf]

**Table S1: Compatibility between matching tissues from different datasets.**

**Table S1A. Correlations between corresponding tissues from different sources as determined by the expression levels of commonly detected genes in each tissue pair.**

| Expression data                                                       | Tissue          | Rank <sup>1</sup> | Kendall's tau correlation | P-value    |
|-----------------------------------------------------------------------|-----------------|-------------------|---------------------------|------------|
| Transcript levels (GNF: RNA-seq) <sup>2</sup>                         | Adipose         | 1                 | 0.36                      | 9.5e-130   |
|                                                                       | Adrenal         | 2                 | 0.26                      | 3.12e-64   |
|                                                                       | Brain           | 1                 | 0.34                      | 4.2e-225   |
|                                                                       | Colon           | 1                 | 0.35                      | 5.71e-132  |
|                                                                       | Heart           | 1                 | 0.32                      | 1.09e-126  |
|                                                                       | Kidney          | 1                 | 0.33                      | 3.33e-82   |
|                                                                       | Liver           | 1                 | 0.39                      | 8.56e-136  |
|                                                                       | Lung            | 1                 | 0.37                      | 1.38e-157  |
|                                                                       | Lymph Node      | 1                 | 0.35                      | 4.66e-113  |
|                                                                       | Ovary           | 1                 | 0.31                      | 8.95e-58   |
|                                                                       | Prostate        | 1                 | 0.31                      | 2.44e-120  |
|                                                                       | Skeletal Muscle | 1                 | 0.3                       | 2.92e-55   |
|                                                                       | Testis          | 1                 | 0.35                      | 1.78e-161  |
|                                                                       | Thyroid         | 1                 | 0.36                      | 2.45e-174  |
| WBC                                                                   | 1               | 0.37              | 1.98e-297                 |            |
| Protein and gene expression levels (HPA: GNF or RNA-seq) <sup>3</sup> | Adrenal         | 1                 | 0.07                      | 9.72e-05   |
|                                                                       | Brain           | 1                 | 0.12                      | 3.57e-44   |
|                                                                       | Breast          | 3                 | 0.07                      | 1.92e-11   |
|                                                                       | Colon           | 1                 | 0.06                      | 0.00061829 |
|                                                                       | Heart           | 1                 | 0.07                      | 2.14e-11   |
|                                                                       | Kidney          | 1                 | 0.106                     | 7.89e-07   |
|                                                                       | Liver           | 1                 | 0.11                      | 3.69e-24   |
|                                                                       | Lung            | 1                 | 0.09                      | 2.24e-24   |
|                                                                       | Lymph Node      | 1                 | 0.11                      | 1.97e-08   |
|                                                                       | Ovary           | 1                 | 0.09                      | 8.31e-18   |
|                                                                       | Prostate        | 1                 | 0.12                      | 4.74e-11   |
|                                                                       | Skeletal Muscle | 1                 | 0.03                      | 0.002      |
|                                                                       | Testis          | 1                 | 0.13                      | 9.36e-51   |
|                                                                       | Thyroid         | 1                 | 0.09                      | 2.75e-23   |

<sup>1</sup>The ranking of the correlation value of corresponding tissues (e.g. Adipose in GNF versus Adipose in RNA-seq) compared to non-corresponding tissues (e.g. Adipose in GNF versus Colon in RNA-seq). Highest correlation value is ranked 1.

<sup>2</sup> GNF tissues best correlated with their corresponding RNA-seq tissues in 14 of the 15 tissues that were measured by both GNF and RNA-seq.

<sup>3</sup> HPA tissues best correlated with their corresponding gene tissues in 13 of the 14 tissues for which protein expression levels were measured (best rank shown).

**Table S1B. Overlap in edges between matching tissues shows significant overlap between different sources.**

| Tissue          | GNF Edges | HPA Edges | RNA-Seq edges | GNF/RNA-Seq %overlap <sup>1</sup> | P value <sup>2</sup> | HPA/RNA-Seq %overlap <sup>1</sup> | P value  |
|-----------------|-----------|-----------|---------------|-----------------------------------|----------------------|-----------------------------------|----------|
| Adipose         | 5176      | N/A       | 36291         | 70.92                             | 4.8e-151             | N/A                               |          |
| Adrenal         | 4869      | 18499     | 38036         | 68.12                             | 8.7e-68              | 71.97                             | 0        |
| Brain           | 11202     | 20557     | 37122         | 70.51                             | 8.4e-294             | 70.89                             | 0        |
| Breast          | N/A       | 18042     | 37624         | N/A                               | N/A                  | 70.82                             | 0        |
| Colon           | 6417      | 19680     | 37002         | 68.87                             | 3.8e-128             | 70.71                             | 0        |
| Heart           | 7684      | 11811     | 34379         | 67.28                             | 7.3e-207             | 66.90                             | 4.9e-324 |
| Kidney          | 3112      | 21025     | 37657         | 65.16                             | 1.4e-27              | 71.42                             | 0        |
| Liver           | 4470      | 14176     | 30416         | 65.32                             | 2.7e-174             | 59.40                             | 9.9e-324 |
| Lung            | 6779      | 20288     | 38480         | 66.98                             | 1.1e-69              | 71.72                             | 0        |
| Lymph Node      | 5057      | 16759     | 39057         | 69.48                             | 1.1e-69              | 73.5                              | 0        |
| Ovary           | 2116      | 12454     | 38511         | 68.80                             | 1.8e-29              | 73.12                             | 0        |
| Prostate        | 7220      | 16888     | 39029         | 68.78                             | 1.5e-90              | 72.73                             | 0        |
| Skeletal Muscle | 2523      | 11400     | 31616         | 64.96                             | 1.8e-77              | 62.48                             | 1.1e-294 |
| Testis          | 7242      | 21232     | 41173         | 72.46                             | 6.0e-103             | 75.54                             | 0        |
| Thyroid         | 8096      | 17881     | 38193         | 71.22                             | 4.0e-182             | 73.21                             | 0        |
| WBC             | 20628     | N/A       | 33725         | 68.76                             | 0                    | N/A                               | N/A      |

<sup>1</sup> Percent is based on fraction of overlap out of the smaller set.

<sup>2</sup> Computed using Fisher exact test.
