# Supplementary material for: Comparative Analysis of Human Tissue Interactomes Reveals Factors Leading to Tissue-Specific Manifestation of Hereditary Diseases
Source: PubMed Central journal article supplement (PMC4055280; doi:10.1371/journal.pcbi.1003632), 2014-06-12
Supplement: pcbi.1003632.s010.pdf [file pcbi.1003632.s010.pdf]

**Table S2: Gene ontology (GO) enrichment of globally expressed genes relative to all expressed genes.** Analysis was performed using the DAVID functional annotation chart with GO term Level of 5. Only terms with a corrected p-value  $< 10^{-5}$  with at least 50 genes in the query set are reported. DAVID identified 7,004 genes out of 10,490 globally expressed genes (expressed in 14-16 tissues). The analysis was performed against a background list of 10,599 genes identified by David out of 17,214 genes expressed in 1-16 tissues.

| GO Term                                                           | Count | FDR corrected p-value |
|-------------------------------------------------------------------|-------|-----------------------|
| GO:0044267 cellular protein metabolic process                     | 1736  | 1.14E-52              |
| GO:0016070 RNA metabolic process                                  | 764   | 5.68E-47              |
| GO:0006412 translation                                            | 284   | 4.33E-38              |
| GO:0006396 RNA processing                                         | 466   | 1.07E-37              |
| GO:0008380 RNA splicing                                           | 254   | 6.10E-29              |
| GO:0015031 protein transport                                      | 609   | 2.78E-27              |
| GO:0016071 mRNA metabolic process                                 | 320   | 8.40E-27              |
| GO:0006397 mRNA processing                                        | 281   | 9.56E-26              |
| GO:0006886 intracellular protein transport                        | 319   | 6.62E-21              |
| GO:0043632 modification-dependent macromolecule catabolic process | 452   | 6.82E-21              |
| GO:0044257 cellular protein catabolic process                     | 472   | 8.30E-21              |
| GO:0030163 protein catabolic process                              | 486   | 9.76E-21              |
| GO:0034660 ncRNA metabolic process                                | 193   | 5.31E-15              |
| GO:0006464 protein modification process                           | 1019  | 6.59E-13              |
| GO:0045333 cellular respiration                                   | 94    | 7.66E-13              |
| GO:0034470 ncRNA processing                                       | 158   | 8.43E-13              |
| GO:0006605 protein targeting                                      | 184   | 4.71E-12              |
| GO:0006414 translational elongation                               | 88    | 7.31E-12              |
| GO:0048193 Golgi vesicle transport                                | 117   | 1.98E-11              |
| GO:0016568 chromatin modification                                 | 220   | 1.06E-10              |
| GO:0006457 protein folding                                        | 139   | 1.16E-08              |
| GO:0022904 respiratory electron transport chain                   | 62    | 1.75E-08              |
| GO:0006351 transcription, DNA-dependent                           | 220   | 2.28E-08              |
| GO:0051169 nuclear transport                                      | 133   | 2.42E-08              |
| GO:0032774 RNA biosynthetic process                               | 222   | 2.71E-08              |
| GO:0006913 nucleocytoplasmic transport                            | 132   | 3.17E-08              |
| GO:0010605 negative regulation of macromolecule metabolic process | 515   | 3.60E-08              |
| GO:0006281 DNA repair                                             | 215   | 3.64E-08              |
| GO:0031324 negative regulation of cellular metabolic process      | 507   | 4.05E-08              |
| GO:0051246 regulation of protein metabolic process                | 399   | 4.63E-08              |
| GO:0022618 ribonucleoprotein complex assembly                     | 64    | 4.90E-08              |
| GO:0016310 phosphorylation                                        | 575   | 6.26E-08              |
| GO:0050657 nucleic acid transport                                 | 84    | 6.74E-08              |
| GO:0050658 RNA transport                                          | 84    | 6.74E-08              |
| GO:0006259 DNA metabolic process                                  | 359   | 1.60E-07              |
| GO:0033365 protein localization in organelle                      | 120   | 3.22E-07              |
| GO:0042773 ATP synthesis coupled electron transport               | 54    | 3.31E-07              |
| GO:0051028 mRNA transport                                         | 75    | 3.46E-07              |
| GO:0017038 protein import                                         | 110   | 3.53E-07              |

|                                                                      |     |          |
|----------------------------------------------------------------------|-----|----------|
| GO:0032268 regulation of cellular protein metabolic process          | 345 | 4.60E-07 |
| GO:0032269 negative regulation of cellular protein metabolic process | 145 | 5.99E-07 |
| GO:0051248 negative regulation of protein metabolic process          | 148 | 2.20E-06 |
| GO:0006352 transcription initiation                                  | 70  | 5.12E-06 |
