# Supplementary material for: Comparative Analysis of Human Tissue Interactomes Reveals Factors Leading to Tissue-Specific Manifestation of Hereditary Diseases
Source: PubMed Central journal article supplement (PMC4055280; doi:10.1371/journal.pcbi.1003632), 2014-06-12
Supplement: pcbi.1003632.s011.pdf [file pcbi.1003632.s011.pdf]

**Table S3: GO enrichment of tissue-specific genes relative to all expressed genes.**

Analysis was performed using the DAVID functional annotation chart with GO term Level of 5. Only terms with a corrected p-value  $< 10^{-5}$  with at least 50 genes in the query set are reported. DAVID identified 1,135 genes out of 2,411 tissue-specific genes (expressed in 1-3 tissues). The analysis was performed against a background list of 10,599 identified by David out of 17,214 genes expressed in 1-16 tissues.

| <b>GO Term</b>                                                  | <b>Count</b> | <b>FDR corrected p-value</b> |
|-----------------------------------------------------------------|--------------|------------------------------|
| GO:0042742 defense response to bacterium                        | 34           | 2.02E-08                     |
| GO:0007283 spermatogenesis                                      | 63           | 7.30E-06                     |
| GO:0030001 metal ion transport                                  | 84           | 2.35E-05                     |
| GO:0007186 G-protein coupled receptor protein signaling pathway | 98           | 5.82E-05                     |
| GO:0006812 cation transport                                     | 92           | 1.45E-04                     |
| GO:0007600 sensory perception                                   | 61           | 7.24E-04                     |
| GO:0006820 anion transport                                      | 34           | 6.69E-04                     |
