# Supplementary material for: Comparative Analysis of Human Tissue Interactomes Reveals Factors Leading to Tissue-Specific Manifestation of Hereditary Diseases
Source: PubMed Central journal article supplement (PMC4055280; doi:10.1371/journal.pcbi.1003632), 2014-06-12
Supplement: pcbi.1003632.s012.pdf [file pcbi.1003632.s012.pdf]

**Table S4: GO enrichment of core proteins relative to all interactome proteins.**

Analysis was performed using the DAVID functional annotation chart with GO term Level of 5. Only terms with a corrected p-value  $< 10^{-5}$  with at least 50 genes in the query set are reported. DAVID identified 3,899 genes out of the 4,989 genes in the core interactome. The analysis was performed against a background list of 7,909 genes identified by DAVID out of 11,225 genes in the global interactome.

| GO Term                                                                                       | Count | FDR corrected p-value |
|-----------------------------------------------------------------------------------------------|-------|-----------------------|
| GO:0016070 RNA metabolic process                                                              | 584   | 2.77E-44              |
| GO:0044267 cellular protein metabolic process                                                 | 1167  | 1.95E-36              |
| GO:0006396 RNA processing                                                                     | 361   | 7.63E-36              |
| GO:0008380 RNA splicing                                                                       | 220   | 1.67E-30              |
| GO:0006397 mRNA processing                                                                    | 239   | 1.51E-30              |
| GO:0016071 mRNA metabolic process                                                             | 268   | 1.43E-30              |
| GO:0044257 cellular protein catabolic process                                                 | 373   | 1.44E-22              |
| GO:0030163 protein catabolic process                                                          | 380   | 3.84E-22              |
| GO:0043632 modification-dependent macromolecule catabolic process                             | 356   | 4.36E-22              |
| GO:0006412 translation                                                                        | 207   | 5.90E-22              |
| GO:0015031 protein transport                                                                  | 438   | 4.32E-21              |
| GO:0006886 intracellular protein transport                                                    | 250   | 1.57E-16              |
| GO:0016568 chromatin modification                                                             | 182   | 2.57E-10              |
| GO:0048193 Golgi vesicle transport                                                            | 99    | 7.93E-10              |
| GO:0006352 transcription initiation                                                           | 67    | 2.46E-08              |
| GO:0006414 translational elongation                                                           | 74    | 2.43E-08              |
| GO:0006605 protein targeting                                                                  | 141   | 1.03E-07              |
| GO:0006351 transcription, DNA-dependent                                                       | 180   | 1.06E-07              |
| GO:0022618 ribonucleoprotein complex assembly                                                 | 58    | 1.62E-07              |
| GO:0032774 RNA biosynthetic process                                                           | 181   | 1.91E-07              |
| GO:0034660 ncRNA metabolic process                                                            | 127   | 3.28E-07              |
| GO:0051351 positive regulation of ligase activity                                             | 62    | 7.11E-07              |
| GO:0006508 proteolysis                                                                        | 446   | 8.66E-07              |
| GO:0051436 negative regulation of ubiquitin-protein ligase activity during mitotic cell cycle | 56    | 1.29E-06              |
| GO:0051437 positive regulation of ubiquitin-protein ligase activity during mitotic cell cycle | 58    | 1.47E-06              |
| GO:0034470 ncRNA processing                                                                   | 106   | 1.97E-06              |
| GO:0051352 negative regulation of ligase activity                                             | 57    | 2.24E-06              |
| GO:0031400 negative regulation of protein modification process                                | 87    | 2.66E-06              |
| GO:0051438 regulation of ubiquitin-protein ligase activity                                    | 64    | 4.75E-06              |
| GO:0045333 cellular respiration                                                               | 65    | 1.84E-05              |
| GO:0032269 negative regulation of cellular protein metabolic process                          | 117   | 2.37E-05              |
| GO:0050657 nucleic acid transport                                                             | 68    | 2.56E-05              |
| GO:0050658 RNA transport                                                                      | 68    | 2.56E-05              |
| GO:0006281 DNA repair                                                                         | 167   | 2.94E-05              |
| GO:0010608 posttranscriptional regulation of gene expression                                  | 124   | 3.00E-05              |
| GO:0033365 protein localization in organelle                                                  | 93    | 4.97E-05              |
| GO:0006464 protein modification process                                                       | 647   | 5.59E-05              |

|                                                    |     |          |
|----------------------------------------------------|-----|----------|
| GO:0051246 regulation of protein metabolic process | 295 | 7.59E-05 |
| GO:0006457 protein folding                         | 96  | 9.33E-05 |
