# Supplementary material for: Comparative Analysis of Human Tissue Interactomes Reveals Factors Leading to Tissue-Specific Manifestation of Hereditary Diseases
Source: PubMed Central journal article supplement (PMC4055280; doi:10.1371/journal.pcbi.1003632), 2014-06-12
Supplement: pcbi.1003632.s013.pdf [file pcbi.1003632.s013.pdf]

**Table S5: GO enrichment of tissue hubs versus the global interactome.**

Analysis was performed using the DAVID functional annotation chart with GO term Level of 5. Only terms with a corrected p-value  $< 10^{-5}$  with at least 50 genes in the query set are reported. DAVID identified 386 genes out of the 451 tissue hubs. The analysis was performed against a background list of 7,909 genes identified by DAVID out of 11,225 genes in the global interactome.

| GO Term                                                                                        | Count | FDR corrected p-value |
|------------------------------------------------------------------------------------------------|-------|-----------------------|
| GO:0043067 regulation of programmed cell death                                                 | 107   | 1.09E-24              |
| GO:0042981 regulation of apoptosis                                                             | 106   | 1.01E-24              |
| GO:0006464 protein modification process                                                        | 136   | 4.37E-23              |
| GO:0051246 regulation of protein metabolic process                                             | 84    | 4.15E-23              |
| GO:0010604 positive regulation of macromolecule metabolic process                              | 104   | 4.87E-21              |
| GO:0031325 positive regulation of cellular metabolic process                                   | 104   | 2.36E-20              |
| GO:0010605 negative regulation of macromolecule metabolic process                              | 91    | 6.82E-19              |
| GO:0031324 negative regulation of cellular metabolic process                                   | 89    | 1.54E-18              |
| GO:0044267 cellular protein metabolic process                                                  | 170   | 3.76E-18              |
| GO:0031326 regulation of cellular biosynthetic process                                         | 183   | 8.48E-18              |
| GO:0043068 positive regulation of programmed cell death                                        | 66    | 9.56E-18              |
| GO:0010556 regulation of macromolecule biosynthetic process                                    | 178   | 9.68E-18              |
| GO:0010942 positive regulation of cell death                                                   | 66    | 1.08E-17              |
| GO:0043065 positive regulation of apoptosis                                                    | 65    | 2.27E-17              |
| GO:0010468 regulation of gene expression                                                       | 178   | 3.36E-17              |
| GO:0019219 regulation of nucleobase, nucleoside, nucleotide and nucleic acid metabolic process | 172   | 7.07E-16              |
| GO:0045449 regulation of transcription                                                         | 162   | 7.31E-16              |
| GO:0032268 regulation of cellular protein metabolic process                                    | 65    | 3.84E-15              |
| GO:0009891 positive regulation of biosynthetic process                                         | 80    | 4.54E-15              |
| GO:0031328 positive regulation of cellular biosynthetic process                                | 79    | 9.44E-15              |
| GO:0043066 negative regulation of apoptosis                                                    | 55    | 8.99E-15              |
| GO:0043069 negative regulation of programmed cell death                                        | 55    | 2.58E-14              |
| GO:0051173 positive regulation of nitrogen compound metabolic process                          | 76    | 2.45E-14              |
| GO:0060548 negative regulation of cell death                                                   | 55    | 2.35E-14              |
| GO:0051252 regulation of RNA metabolic process                                                 | 122   | 6.03E-14              |
| GO:0010557 positive regulation of macromolecule biosynthetic process                           | 75    | 1.01E-13              |
| GO:0010629 negative regulation of gene expression                                              | 64    | 1.54E-13              |
| GO:0009966 regulation of signal transduction                                                   | 83    | 1.68E-13              |
| GO:0051253 negative regulation of RNA metabolic process                                        | 52    | 4.16E-13              |
| GO:0006355 regulation of transcription, DNA-dependent                                          | 117   | 7.42E-13              |
| GO:0045941 positive regulation of transcription                                                | 67    | 1.04E-12              |
| GO:0051172 negative regulation of nitrogen compound metabolic process                          | 63    | 1.14E-12              |
| GO:0010628 positive regulation of gene expression                                              | 68    | 1.23E-12              |

|                                                                                                         |    |          |
|---------------------------------------------------------------------------------------------------------|----|----------|
| GO:0045935 positive regulation of nucleobase, nucleoside, nucleotide and nucleic acid metabolic process | 71 | 1.45E-12 |
| GO:0045934 negative regulation of nucleobase, nucleoside, nucleotide and nucleic acid metabolic process | 62 | 2.20E-12 |
| GO:0016481 negative regulation of transcription                                                         | 58 | 2.37E-12 |
| GO:0045892 negative regulation of transcription, DNA-dependent                                          | 50 | 3.05E-12 |
| GO:0010558 negative regulation of macromolecule biosynthetic process                                    | 64 | 3.19E-12 |
| GO:0009890 negative regulation of biosynthetic process                                                  | 65 | 7.44E-12 |
| GO:0031327 negative regulation of cellular biosynthetic process                                         | 64 | 9.33E-12 |
| GO:0012502 induction of programmed cell death                                                           | 46 | 3.06E-11 |
| GO:0045893 positive regulation of transcription, DNA-dependent                                          | 57 | 8.66E-11 |
| GO:0051254 positive regulation of RNA metabolic process                                                 | 57 | 1.14E-10 |
| GO:0030163 protein catabolic process                                                                    | 65 | 1.44E-10 |
| GO:0044257 cellular protein catabolic process                                                           | 64 | 1.42E-10 |
| GO:0007242 intracellular signaling cascade                                                              | 99 | 2.81E-10 |
| GO:0043632 modification-dependent macromolecule catabolic process                                       | 59 | 4.08E-09 |
| GO:0007243 protein kinase cascade                                                                       | 46 | 5.11E-09 |
| GO:0006916 anti-apoptosis                                                                               | 33 | 8.67E-09 |
| GO:0016310 phosphorylation                                                                              | 71 | 9.11E-09 |
| GO:0051174 regulation of phosphorus metabolic process                                                   | 53 | 9.95E-09 |
| GO:0019220 regulation of phosphate metabolic process                                                    | 53 | 9.95E-09 |
| GO:0006259 DNA metabolic process                                                                        | 53 | 1.47E-08 |
