# Supplementary material for: Comparative Analysis of Human Tissue Interactomes Reveals Factors Leading to Tissue-Specific Manifestation of Hereditary Diseases
Source: PubMed Central journal article supplement (PMC4055280; doi:10.1371/journal.pcbi.1003632), 2014-06-12
Supplement: pcbi.1003632.s014.pdf [file pcbi.1003632.s014.pdf]

**Table S6: GO enrichment of global hubs versus global genes.**

Analysis was performed using the DAVID functional annotation chart with GO term Level of 5. Only terms with a corrected p-value  $< 10^{-5}$  with at least 50 genes in the query set are reported. DAVID identified 207 genes out of the 221 global hubs. The analysis was performed against a background list of 3,931 genes identified by DAVID out of 5,033 genes in all 16 tissues.

| <b>GO Term</b>                                                                                 | <b>Count</b> | <b>FDR corrected p-value</b> |
|------------------------------------------------------------------------------------------------|--------------|------------------------------|
| GO:0031328 positive regulation of cellular biosynthetic process                                | 52           | 1.38E-13                     |
| GO:0009891 positive regulation of biosynthetic process                                         | 52           | 2.08E-13                     |
| GO:0042981 regulation of apoptosis                                                             | 58           | 1.43E-12                     |
| GO:0031325 positive regulation of cellular metabolic process                                   | 60           | 1.56E-12                     |
| GO:0043067 regulation of programmed cell death                                                 | 58           | 1.27E-12                     |
| GO:0051173 positive regulation of nitrogen compound metabolic process                          | 50           | 1.36E-12                     |
| GO:0010604 positive regulation of macromolecule metabolic process                              | 59           | 1.38E-12                     |
| GO:0051252 regulation of RNA metabolic process                                                 | 73           | 2.00E-11                     |
| GO:0019219 regulation of nucleobase, nucleoside, nucleotide and nucleic acid metabolic process | 101          | 2.38E-11                     |
| GO:0031326 regulation of cellular biosynthetic process                                         | 104          | 2.21E-11                     |
| GO:0010556 regulation of macromolecule biosynthetic process                                    | 102          | 1.10E-10                     |
| GO:0006355 regulation of transcription, DNA-dependent                                          | 69           | 1.89E-10                     |
| GO:0045449 regulation of transcription                                                         | 94           | 1.93E-10                     |
| GO:0010468 regulation of gene expression                                                       | 102          | 3.00E-10                     |
| GO:0006464 protein modification process                                                        | 74           | 5.70E-10                     |
| GO:0010605 negative regulation of macromolecule metabolic process                              | 51           | 7.60E-09                     |
| GO:0007242 intracellular signaling cascade                                                     | 53           | 4.50E-06                     |
| GO:0044267 cellular protein metabolic process                                                  | 96           | 8.37E-06                     |
