# Supplementary material for: Comparative Analysis of Human Tissue Interactomes Reveals Factors Leading to Tissue-Specific Manifestation of Hereditary Diseases
Source: PubMed Central journal article supplement (PMC4055280; doi:10.1371/journal.pcbi.1003632), 2014-06-12
Supplement: pcbi.1003632.s015.pdf [file pcbi.1003632.s015.pdf]

**Table S7: Distribution of the number of hereditary diseases and their causal germline-aberrant disease genes by number of disease tissues they affect shows that most hereditary diseases are tissue-specific.**

| <b>Number of affected tissues</b> | <b>Number of hereditary diseases</b> | <b>Number of causal genes</b> |
|-----------------------------------|--------------------------------------|-------------------------------|
| 1                                 | 293                                  | 182                           |
| 2                                 | 6                                    | 39                            |
| 3                                 | 3                                    | 10                            |
| 4                                 | 1                                    | 1                             |
