# Supplementary material for: Comparative Analysis of Human Tissue Interactomes Reveals Factors Leading to Tissue-Specific Manifestation of Hereditary Diseases
Source: PubMed Central journal article supplement (PMC4055280; doi:10.1371/journal.pcbi.1003632), 2014-06-12
Supplement: pcbi.1003632.s016.pdf [file pcbi.1003632.s016.pdf]

**Table S8: Hereditary diseases, their causal genes and their tissue-specific PPIs in their disease tissues.** An interaction is tissue-specific if it occurs in at most 3 tissues.

| Disease Name                                                          | Causal gene symbol | Interactor gene symbol | Disease tissue with tissue-specific PPI | Other tissues with PPI | Number of causal gene PPIs in disease tissues |
|-----------------------------------------------------------------------|--------------------|------------------------|-----------------------------------------|------------------------|-----------------------------------------------|
| 46XY partial gonadal dysgenesis with minifascicular neuropathy        | DHH                | HHIP                   | testis                                  |                        | 1                                             |
| Afibrinogenemia congenital                                            | FGA                | HRG                    | kidney, liver                           |                        | 17                                            |
| Afibrinogenemia congenital                                            | FGA                | APOA1                  | kidney                                  |                        | 17                                            |
| Afibrinogenemia congenital                                            | FGA                | KLK6                   | kidney                                  | brain                  | 17                                            |
| Afibrinogenemia congenital                                            | FGB                | LPA                    | liver                                   | kidney                 | 7                                             |
| Alzheimer disease 1 familial                                          | APP                | SNCB                   | brain                                   |                        | 86                                            |
| Alzheimer disease 1 familial                                          | APP                | GFAP                   | brain                                   | lung                   | 86                                            |
| Alzheimer disease 1 familial                                          | APP                | SHC3                   | brain                                   |                        | 86                                            |
| Alzheimer disease type 3 with spastic paraparesis and unusual plaques | PSEN1              | ICAM5                  | brain                                   | placenta, lung         | 58                                            |
| Alzheimer disease type 3 with spastic paraparesis and unusual plaques | PSEN1              | GFAP                   | brain                                   | lung                   | 58                                            |
| Alzheimer disease-4                                                   | PSEN2              | ICAM5                  | brain                                   | placenta, lung         | 27                                            |
| Alzheimer disease-4                                                   | PSEN2              | GFAP                   | brain                                   | lung                   | 27                                            |
| Amyloidosis hereditary transthyretin-related                          | TTR                | APOA1                  | kidney                                  |                        | 24                                            |
| Amyloidosis renal                                                     | APOA1              | CP                     | kidney                                  |                        | 25                                            |
| Amyloidosis renal                                                     | APOA1              | TF                     | kidney                                  |                        | 25                                            |
| Amyloidosis renal                                                     | APOA1              | APOL1                  | kidney                                  |                        | 25                                            |
| Amyloidosis renal                                                     | APOA1              | PTPN5                  | kidney                                  |                        | 25                                            |
| Amyloidosis renal                                                     | APOA1              | GPLD1                  | kidney                                  |                        | 25                                            |
| Amyloidosis renal                                                     | APOA1              | PDE1A                  | kidney                                  |                        | 25                                            |
| Amyloidosis renal                                                     | APOA1              | FN1                    | kidney                                  |                        | 25                                            |
| Amyloidosis renal                                                     | APOA1              | TTR                    | kidney                                  |                        | 25                                            |
| Amyloidosis renal                                                     | APOA1              | PCMT1                  | kidney                                  |                        | 25                                            |
| Amyloidosis renal                                                     | APOA1              | CLU                    | kidney                                  |                        | 25                                            |
| Amyloidosis renal                                                     | APOA1              | LBP                    | kidney                                  |                        | 25                                            |
| Amyloidosis renal                                                     | APOA1              | LECT1                  | kidney                                  |                        | 25                                            |
| Amyloidosis renal                                                     | APOA1              | APP                    | kidney                                  |                        | 25                                            |
| Amyloidosis renal                                                     | APOA1              | SPEF2                  | kidney                                  |                        | 25                                            |
| Amyloidosis renal                                                     | APOA1              | ROBO3                  | kidney                                  |                        | 25                                            |
| Amyloidosis renal                                                     | APOA1              | C1QC                   | kidney                                  |                        | 25                                            |
| Amyloidosis renal                                                     | APOA1              | RRP1B                  | kidney                                  |                        | 25                                            |
| Amyloidosis renal                                                     | APOA1              | ALB                    | kidney                                  |                        | 25                                            |
| Amyloidosis renal                                                     | APOA1              | KRT9                   | kidney                                  |                        | 25                                            |
| Amyloidosis renal                                                     | APOA1              | FGA                    | kidney                                  |                        | 25                                            |
| Amyloidosis renal                                                     | APOA1              | SMPDL3A                | kidney                                  |                        | 25                                            |

|                                                                                |        |           |                        |              |     |
|--------------------------------------------------------------------------------|--------|-----------|------------------------|--------------|-----|
| Amyloidosis renal                                                              | APOA1  | TNFRSF10C | kidney                 |              | 25  |
| Amyloidosis renal                                                              | APOA1  | TOMM20    | kidney                 |              | 25  |
| Amyloidosis renal                                                              | APOA1  | PDE4B     | kidney                 |              | 25  |
| Amyloidosis renal                                                              | FGA    | HRG       | kidney,liver           |              | 17  |
| Amyloidosis renal                                                              | FGA    | APOA1     | kidney                 |              | 17  |
| Amyloidosis renal                                                              | FGA    | KLK6      | kidney                 | brain        | 17  |
| Androgen insensitivity                                                         | AR     | POU2F2    | testis                 |              | 160 |
| Androgen insensitivity                                                         | AR     | MAGEA11   | testis                 |              | 160 |
| Androgen insensitivity                                                         | AR     | DCC       | testis                 |              | 160 |
| Antley-Bixler syndrome without genital anomalies or disordered steroidogenesis | FGFR2  | FGF9      | brain,ovary,kidney     | prostate     | 8   |
| Antley-Bixler syndrome without genital anomalies or disordered steroidogenesis | FGFR2  | FGF1      | brain,kidney           | colon,breast | 7   |
| Apert syndrome                                                                 | FGFR2  | FGF9      | brain,ovary,kidney     | prostate     | 8   |
| Apert syndrome                                                                 | FGFR2  | FGF1      | brain,kidney           | colon,breast | 7   |
| Atrial septal defect 2                                                         | GATA4  | NKX2-5    | heart                  | thyroid      | 13  |
| Atrial septal defect 7 with or without AV conduction defects                   | NKX2-5 | TBX5      | heart                  | thyroid      | 7   |
| Atrial septal defect 7 with or without AV conduction defects                   | NKX2-5 | CAMTA2    | heart                  | thyroid      | 7   |
| Atrial septal defect 7 with or without AV conduction defects                   | NKX2-5 | ID2       | heart                  | thyroid      | 7   |
| Atrial septal defect 7 with or without AV conduction defects                   | NKX2-5 | HDAC1     | heart                  | thyroid      | 7   |
| Atrial septal defect 7 with or without AV conduction defects                   | NKX2-5 | ID3       | heart                  | thyroid      | 7   |
| Atrial septal defect 7 with or without AV conduction defects                   | NKX2-5 | ID1       | heart                  | thyroid      | 7   |
| Atrial septal defect 7 with or without AV conduction defects                   | NKX2-5 | GATA4     | heart                  | thyroid      | 7   |
| Becker muscular dystrophy                                                      | DMD    | SNTA1     | Skeletal muscle        |              | 11  |
| Becker muscular dystrophy                                                      | DMD    | DTNA      | Skeletal muscle I      |              | 11  |
| Becker muscular dystrophy                                                      | DMD    | ARRB1     | Skeletal muscle        |              | 11  |
| Becker muscular dystrophy                                                      | DMD    | ACTA1     | Skeletal muscle, heart |              | 11  |
| Becker muscular dystrophy                                                      | DMD    | ANK2      | Skeletal muscle        |              | 11  |
| Becker muscular dystrophy                                                      | DMD    | ALB       | Skeletal muscle, heart |              | 11  |
| Becker muscular dystrophy                                                      | DMD    | SNTB2     | Skeletal muscle        |              | 11  |
| Becker muscular dystrophy                                                      | DMD    | SNTB1     | Skeletal muscle, heart |              | 11  |
| Becker muscular dystrophy                                                      | DMD    | DAG1      | Skeletal muscle, heart |              | 11  |

|                                     |        |        |                        |                         |    |
|-------------------------------------|--------|--------|------------------------|-------------------------|----|
| Becker muscular dystrophy           | DMD    | KCNJ12 | Skeletal muscle, heart |                         | 11 |
| Becker muscular dystrophy           | DMD    | MAP3K5 | Skeletal muscle        |                         | 11 |
| Campomelic dysplasia                | SOX9   | NR5A1  | Testis                 | ovary                   | 17 |
| Cardiomyopathy dilated 1A           | MYBPC3 | SMURF2 | Heart                  |                         | 4  |
| Cardiomyopathy dilated 1A           | MYBPC3 | TTN    | Heart                  |                         | 4  |
| Cardiomyopathy dilated 1A           | MYBPC3 | TRIM63 | Heart                  |                         | 4  |
| Cardiomyopathy dilated 1A           | MYBPC3 | ALK    | Heart                  |                         | 4  |
| Cardiomyopathy dilated 1G           | TTN    | MYBPC3 | heart                  |                         | 14 |
| Cardiomyopathy dilated 3B           | DMD    | SNTA1  | Skeletal muscle        |                         | 11 |
| Cardiomyopathy dilated 3B           | DMD    | DTNA   | Skeletal muscle        |                         | 11 |
| Cardiomyopathy dilated 3B           | DMD    | ARRB1  | Skeletal muscle        |                         | 11 |
| Cardiomyopathy dilated 3B           | DMD    | ACTA1  | Skeletal muscle, heart |                         | 11 |
| Cardiomyopathy dilated 3B           | DMD    | ANK2   | Skeletal muscle        |                         | 11 |
| Cardiomyopathy dilated 3B           | DMD    | ALB    | Skeletal muscle, heart |                         | 11 |
| Cardiomyopathy dilated 3B           | DMD    | SNTB2  | Skeletal muscle        |                         | 11 |
| Cardiomyopathy dilated 3B           | DMD    | SNTB1  | Skeletal muscle, heart |                         | 11 |
| Cardiomyopathy dilated 3B           | DMD    | DAG1   | Skeletal muscle, heart |                         | 11 |
| Cardiomyopathy dilated 3B           | DMD    | KCNJ12 | Skeletal muscle, heart |                         | 11 |
| Cardiomyopathy dilated 3B           | DMD    | MAP3K5 | Skeletal muscle        |                         | 11 |
| Cardiomyopathy familial restrictive | TNNI3  | SMURF2 | Heart                  | testis, skeletal muscle | 7  |
| Cardiomyopathy familial restrictive | TNNI3  | TNNC1  | Heart                  | testis, skeletal muscle | 7  |
| Cardiomyopathy familial restrictive | TNNI3  | TNNT2  | Heart                  | testis, skeletal muscle | 7  |
| Cardiomyopathy familial restrictive | TNNI3  | PKD2   | Heart                  | testis, skeletal muscle | 7  |
| Cardiomyopathy familial restrictive | TNNI3  | TRIM21 | Heart                  | testis, skeletal muscle | 7  |
| Cardiomyopathy familial restrictive | TNNI3  | LYST   | Heart                  | testis                  | 7  |
| Cardiomyopathy familial restrictive | TNNI3  | TRIM63 | heart                  | testis, skeletal muscle | 7  |

|                                                      |        |          |                        |                  |     |
|------------------------------------------------------|--------|----------|------------------------|------------------|-----|
| Cardiomyopathy hypertrophic midventricular digenic   | CAV3   | DYSF     | Skeletal muscle, heart | kidney, testis   | 8   |
| Cardiomyopathy hypertrophic midventricular digenic   | CAV3   | JPH2     | Skeletal muscle        |                  | 8   |
| Chorea hereditary benign                             | NKX2-1 | CREBBP   | Thyroid                | lung, liver      | 17  |
| Chorea hereditary benign                             | NKX2-1 | PAX8     | thyroid                | Lung             | 17  |
| Chorea hereditary benign                             | NKX2-1 | RARA     | thyroid                | lung, liver      | 17  |
| Chorea hereditary benign                             | NKX2-1 | NCOA2    | thyroid                | lung, liver      | 17  |
| Chorea hereditary benign                             | NKX2-1 | CRK      | thyroid                | appendix, liver  | 17  |
| Chorea hereditary benign                             | NKX2-1 | PTRF     | thyroid                | lung             | 17  |
| Choroid plexus papilloma                             | TP53   | RASGRF1  | brain                  |                  | 291 |
| Choroid plexus papilloma                             | TP53   | CITED1   | breast, brain          | thyroid, testis  | 306 |
| Congenital bilateral absence of vas deferens         | CFTR   | SLC4A8   | lung                   | brain, ovary     | 138 |
| Congenital bilateral absence of vas deferens         | CFTR   | SH3BGRL2 | lung                   | colon, adrenal   | 138 |
| Congenital bilateral absence of vas deferens         | CFTR   | HSPA1L   | testis                 |                  | 115 |
| Congenital bilateral absence of vas deferens         | CFTR   | HSPA1L   | testis                 |                  | 115 |
| Craniofacial-deafness-hand syndrome                  | PAX3   | MEOX1    | Skeletal muscle        | adrenal, thyroid | 14  |
| Creatine phosphokinase elevated serum                | CAV3   | DYSF     | Skeletal muscle, heart | kidney, testis   | 8   |
| Creatine phosphokinase elevated serum                | CAV3   | JPH2     | Skeletal muscle        |                  | 8   |
| Creutzfeldt-Jakob disease                            | PRNP   | C18orf56 | Brain                  | testis           | 50  |
| Cystic fibrosis                                      | CFTR   | SLC4A8   | lung                   | brain, ovary     | 138 |
| Cystic fibrosis                                      | CFTR   | SH3BGRL2 | lung                   | colon, adrenal   | 138 |
| Cystic fibrosis                                      | CFTR   | HSPA1L   | testis                 |                  | 115 |
| Cystic fibrosis                                      | CFTR   | HSPA1L   | testis                 |                  | 115 |
| Dementia frontotemporal with or without parkinsonism | PSEN1  | ICAM5    | brain                  | placenta, lung   | 58  |
| Dementia frontotemporal with or without parkinsonism | PSEN1  | GFAP     | brain                  | lung             | 58  |
| Dementia frontotemporal with or without parkinsonism | MAPT   | SLC1A2   | brain                  | liver            | 31  |
| Dementia Lewy body                                   | SNCA   | SNCB     | brain                  |                  | 58  |
| Dementia Lewy body                                   | SNCA   | PAK3     | brain                  | thyroid, testis  | 58  |
| Duchenne muscular dystrophy                          | DMD    | SNTA1    | Skeletal muscle        |                  | 11  |
| Duchenne muscular dystrophy                          | DMD    | DTNA     | Skeletal muscle        |                  | 11  |
| Duchenne muscular dystrophy                          | DMD    | ARRB1    | Skeletal muscle        |                  | 11  |
| Duchenne muscular dystrophy                          | DMD    | ACTA1    | Skeletal muscle, heart |                  | 11  |

|                                                                |         |          |                        |                   |    |
|----------------------------------------------------------------|---------|----------|------------------------|-------------------|----|
| Duchenne muscular dystrophy                                    | DMD     | ANK2     | Skeletal muscle        |                   | 11 |
| Duchenne muscular dystrophy                                    | DMD     | ALB      | Skeletal muscle, heart |                   | 11 |
| Duchenne muscular dystrophy                                    | DMD     | SNTB2    | Skeletal muscle        |                   | 11 |
| Duchenne muscular dystrophy                                    | DMD     | SNTB1    | Skeletal muscle, heart |                   | 11 |
| Duchenne muscular dystrophy                                    | DMD     | DAG1     | Skeletal muscle, heart |                   | 11 |
| Duchenne muscular dystrophy                                    | DMD     | KCNJ12   | Skeletal muscle, heart |                   | 11 |
| Duchenne muscular dystrophy                                    | DMD     | MAP3K5   | Skeletal muscle        |                   | 11 |
| Dystonia DOPA-responsive with or without hyperphenylalaninemia | GCH1    | RPH3A    | brain, liver           | wbc, lung         | 9  |
| Dystonia DOPA-responsive with or without hyperphenylalaninemia | GCH1    | RAB26    | brain                  |                   | 9  |
| Epilepsy nocturnal frontal lobe 1                              | CHRNA4  | YWHAH    | brain                  |                   | 1  |
| Episodic ataxia type 2                                         | CACNA1A | SYT1     | brain                  | heart, adrenal    | 5  |
| Episodic ataxia type 2                                         | CACNA1A | CABP1    | brain                  | heart             | 5  |
| Episodic ataxia type 2                                         | CACNA1A | CACNB4   | brain                  | heart, adrenal    | 5  |
| Gerstmann-Straussler disease                                   | PRNP    | C18orf56 | brain                  | testis            | 50 |
| Hemophagocytic lymphohistiocytosis familial 2                  | PRF1    | DDX24    | wbc                    | Bone marrow, lung | 4  |
| Hemophagocytic lymphohistiocytosis familial 2                  | PRF1    | GZMB     | wbc                    | Bone marrow, lung | 4  |
| Hemophagocytic lymphohistiocytosis familial 2                  | PRF1    | SRGN     | wbc                    | Bone marrow, lung | 4  |
| Hemophagocytic lymphohistiocytosis familial 2                  | PRF1    | CALR     | wbc                    | Bone marrow, lung | 4  |
| Huntington disease-like 1                                      | PRNP    | C18orf56 | brain                  | testis            | 50 |
| Hypercholesterolemia due to ligand-defective apo B             | APOB    | MTTP     | liver                  | Small intestine   | 11 |
| Hypercholesterolemia due to ligand-defective apo B             | APOB    | LIPC     | liver                  | kidney            | 11 |
| Hypercholesterolemia familial                                  | LDLR    | PCSK9    | liver                  | lung              | 10 |
| Hypercholesterolemia familial 3                                | PCSK9   | LDLR     | liver                  | lung              | 1  |
| Hyperferritinemia-cataract syndrome                            | FTL     | KNG1     | liver                  | kidney, testis    | 14 |
| Hyperphenylalaninemia BH4-deficient B                          | GCH1    | RPH3A    | brain,liver            | wbc, lung         | 9  |
| Hyperphenylalaninemia BH4-deficient B                          | GCH1    | RAB26    | brain                  |                   | 9  |

|                                                                   |         |           |                      |                 |     |
|-------------------------------------------------------------------|---------|-----------|----------------------|-----------------|-----|
| Hypoalphalipoproteinemia                                          | APOA1   | CP        | kidney               |                 | 25  |
| Hypoalphalipoproteinemia                                          | APOA1   | TF        | kidney               |                 | 25  |
| Hypoalphalipoproteinemia                                          | APOA1   | APOL1     | kidney               |                 | 25  |
| Hypoalphalipoproteinemia                                          | APOA1   | PTPN5     | kidney               |                 | 25  |
| Hypoalphalipoproteinemia                                          | APOA1   | GPLD1     | kidney               |                 | 25  |
| Hypoalphalipoproteinemia                                          | APOA1   | PDE1A     | kidney               |                 | 25  |
| Hypoalphalipoproteinemia                                          | APOA1   | FN1       | kidney               |                 | 25  |
| Hypoalphalipoproteinemia                                          | APOA1   | TTR       | kidney               |                 | 25  |
| Hypoalphalipoproteinemia                                          | APOA1   | PCMT1     | kidney               |                 | 25  |
| Hypoalphalipoproteinemia                                          | APOA1   | CLU       | kidney               |                 | 25  |
| Hypoalphalipoproteinemia                                          | APOA1   | LBP       | kidney               |                 | 25  |
| Hypoalphalipoproteinemia                                          | APOA1   | LECT1     | kidney               |                 | 25  |
| Hypoalphalipoproteinemia                                          | APOA1   | APP       | kidney               |                 | 25  |
| Hypoalphalipoproteinemia                                          | APOA1   | SPEF2     | kidney               |                 | 25  |
| Hypoalphalipoproteinemia                                          | APOA1   | ROBO3     | kidney               |                 | 25  |
| Hypoalphalipoproteinemia                                          | APOA1   | C1QC      | kidney               |                 | 25  |
| Hypoalphalipoproteinemia                                          | APOA1   | RRP1B     | kidney               |                 | 25  |
| Hypoalphalipoproteinemia                                          | APOA1   | ALB       | kidney               |                 | 25  |
| Hypoalphalipoproteinemia                                          | APOA1   | KRT9      | kidney               |                 | 25  |
| Hypoalphalipoproteinemia                                          | APOA1   | FGA       | kidney               |                 | 25  |
| Hypoalphalipoproteinemia                                          | APOA1   | SMPDL3A   | kidney               |                 | 25  |
| Hypoalphalipoproteinemia                                          | APOA1   | TNFRSF10C | kidney               |                 | 25  |
| Hypoalphalipoproteinemia                                          | APOA1   | TOMM20    | kidney               |                 | 25  |
| Hypoalphalipoproteinemia                                          | APOA1   | PDE4B     | kidney               |                 | 25  |
| Hypoalphalipoproteinemia                                          | APOA1   | not found | kidney               |                 | 25  |
| Hypochondroplasia                                                 | FGFR3   | FGF9      | brain                |                 | 22  |
| Hypochondroplasia                                                 | FGFR3   | FGF1      | brain                | colon           | 22  |
| Hypochondroplasia                                                 | FGFR3   | CTSK      | brain                | skin, adrenal   | 22  |
| Hypogonadotropic hypogonadism                                     | FGFR1   | FGF1      | brain                | heart, adipose  | 18  |
| Hypokalemic periodic paralysis type 1                             | CACNA1S | SRI       | skeletal, thyroid    | breast          | 1   |
| Insomnia fatal familial                                           | PRNP    | C18orf56  | brain                | testis          | 50  |
| Jackson-Weiss syndrome                                            | FGFR2   | FGF9      | brain, ovary, kidney | prostate        | 8   |
| Jackson-Weiss syndrome                                            | FGFR2   | FGF1      | brain, kidney        | colon, breast   | 7   |
| Jackson-Weiss syndrome                                            | FGFR1   | FGF1      | brain                | heart, adipose  | 18  |
| Leukoencephalopathy with vanishing white matter                   | EIF2B1  | DCC       | brain                | testis          | 10  |
| Leukoencephalopathy with vanishing white matter                   | EIF2B4  | DCC       | brain                | testis          | 4   |
| Leukoencephalopathy with vanishing white matter                   | EIF2B2  | DCC       | brain                | testis          | 5   |
| Li-Fraumeni syndrome                                              | CHEK2   | GINS2     | adrenal              | testis          | 26  |
| Li-Fraumeni-like syndrome                                         | TP53    | RASGRF1   | brain                |                 | 291 |
| Li-Fraumeni-like syndrome                                         | TP53    | CITED1    | breast, brain        | thyroid, testis | 306 |
| Migraine familial hemiplegic 1 with progressive cerebellar ataxia | CACNA1A | SYT1      | brain                | heart, adrenal  | 5   |

|                                                                                                         |         |         |                        |                |     |
|---------------------------------------------------------------------------------------------------------|---------|---------|------------------------|----------------|-----|
| Migraine familial hemiplegic 1 with progressive cerebellar ataxia                                       | CACNA1A | CABP1   | brain                  | heart          | 5   |
| Migraine familial hemiplegic 1 with progressive cerebellar ataxia                                       | CACNA1A | CACNB4  | brain                  | heart, adrenal | 5   |
| Mismatch repair cancer syndrome                                                                         | MLH1    | PTPRH   | colon                  | liver          | 132 |
| Mismatch repair cancer syndrome                                                                         | MSH2    | ESR2    | ovary                  | testis, breast | 31  |
| Mismatch repair cancer syndrome                                                                         | PMS2    | PSD2    | brain                  |                | 37  |
| Muscular dystrophy limb-girdle type 2J                                                                  | TTN     | MYBPC3  | heart                  |                | 14  |
| Muscular dystrophy limb-girdle type IC                                                                  | CAV3    | DYSF    | Skeletal muscle, heart | kidney, testis | 8   |
| Muscular dystrophy limb-girdle type IC                                                                  | CAV3    | JPH2    | Skeletal muscle        |                | 8   |
| Myasthenic syndrome congenital associated with facial dysmorphism and acetylcholine receptor deficiency | RAPSN   | KHDRBS1 | Skeletal muscle        | thyroid        | 2   |
| Myasthenic syndrome congenital associated with facial dysmorphism and acetylcholine receptor deficiency | RAPSN   | UBE2Z   | Skeletal muscle        | thyroid        | 2   |
| Myasthenic syndrome slow-channel congenital                                                             | CHRND   | CHRNA1  | Skeletal muscle        | thyroid        | 1   |
| Myasthenic syndrome slow-channel congenital                                                             | CHRNA1  | CHRND   | Skeletal muscle        | thyroid        | 3   |
| Myasthenic syndrome slow-channel congenital                                                             | CHRNA1  | CHRNG   | Skeletal muscle        |                | 3   |
| Myopathy nemaline 3                                                                                     | ACTA1   | DMD     | Skeletal muscle        | heart          | 38  |
| Myopathy proximal with early respiratory muscle involvement                                             | TTN     | MYBPC3  | heart                  |                | 14  |
| Neurodegeneration with brain iron accumulation 3                                                        | FTL     | KNG1    | liver                  | kidney, testis | 14  |
| Neuropathy distal hereditary motor type IIA                                                             | HSPB8   | HSPB7   | Skeletal muscle        | heart, adipose | 7   |
| Oculodentodigital dysplasia                                                                             | GJA1    | GJA3    | heart                  | kidney, testis | 10  |
| Ovarian dysgenesis 1                                                                                    | FSHR    | GRK4    | testis                 |                | 5   |
| Ovarian dysgenesis 1                                                                                    | FSHR    | YWHAQ   | testis                 |                | 5   |
| Ovarian dysgenesis 1                                                                                    | FSHR    | UBC     | testis                 |                | 5   |
| Ovarian dysgenesis 1                                                                                    | FSHR    | ADRBK1  | testis                 |                | 5   |
| Ovarian dysgenesis 1                                                                                    | FSHR    | GRK6    | testis                 |                | 5   |
| Ovarian hyperstimulation syndrome                                                                       | FSHR    | GRK4    | testis                 |                | 5   |
| Ovarian hyperstimulation syndrome                                                                       | FSHR    | YWHAQ   | testis                 |                | 5   |
| Ovarian hyperstimulation syndrome                                                                       | FSHR    | UBC     | testis                 |                | 5   |
| Ovarian hyperstimulation                                                                                | FSHR    | ADRBK1  | testis                 |                | 5   |

|                                                                                           |         |          |                        |                  |     |
|-------------------------------------------------------------------------------------------|---------|----------|------------------------|------------------|-----|
| syndrome                                                                                  |         |          |                        |                  |     |
| Ovarian hyperstimulation syndrome                                                         | FSHR    | GRK6     | testis                 |                  | 5   |
| Ovarioleukodystrophy                                                                      | EIF2B4  | DCC      | brain                  | testis           | 4   |
| Parkes Weber syndrome                                                                     | RASA1   | SYN1     | brain                  |                  | 36  |
| Parkinson disease 1,4                                                                     | SNCA    | SNCB     | brain                  |                  | 58  |
| Parkinson disease 1,4                                                                     | SNCA    | SNCB     | brain                  |                  | 58  |
| Parkinson disease 1,4                                                                     | SNCA    | PAK3     | brain                  | thyroid, testis  | 58  |
| Parkinson disease 1,4                                                                     | SNCA    | PAK3     | brain                  | thyroid, testis  | 58  |
| Pick disease                                                                              | PSEN1   | ICAM5    | brain                  | placenta, lung   | 58  |
| Pick disease                                                                              | PSEN1   | GFAP     | brain                  | lung             | 58  |
| Pick disease                                                                              | MAPT    | SLC1A2   | brain                  | liver            | 31  |
| Prion disease with protracted course                                                      | PRNP    | C18orf56 | brain                  | testis           | 50  |
| Pyruvate kinase deficiency                                                                | PKLR    | USPL1    | liver                  | brain, kidney    | 6   |
| Pyruvate kinase deficiency                                                                | PKLR    | USP3     | liver                  | brain, kidney    | 6   |
| Pyruvate kinase deficiency                                                                | PKLR    | CLEC4G   | liver                  |                  | 6   |
| Rippling muscle disease                                                                   | CAV3    | DYSF     | Skeletal muscle, heart | kidney, testis   | 8   |
| Rippling muscle disease                                                                   | CAV3    | JPH2     | Skeletal muscle        |                  | 8   |
| Severe combined immunodeficiency T-cell negative B-cell/natural killer cell-positive type | PTPRC   | GHR      | wbc                    | Lymph node, lung | 29  |
| Severe combined immunodeficiency T-cell negative B-cell/natural killer cell-positive type | PTPRC   | CD1D     | wbc                    | Lymph node       | 29  |
| Severe combined immunodeficiency T-cell negative B-cell/natural killer cell-positive type | PTPRC   | INSR     | wbc                    | Lymph node, lung | 29  |
| Severe combined immunodeficiency T-cell negative B-cell/natural killer cell-positive type | PTPRC   | DPP4     | wbc                    | Lymph node, lung | 29  |
| Severe combined immunodeficiency T-cell negative B-cell/natural killer cell-positive type | PTPRC   | PTPRCAP  | wbc                    | Lymph node       | 29  |
| Severe combined immunodeficiency X-linked                                                 | IL2RG   | IL4R     | wbc                    |                  | 7   |
| Spinocerebellar ataxia 17                                                                 | TBP     | EMID2    | brain                  |                  | 101 |
| Spinocerebellar ataxia 17                                                                 | TBP     | POU3F2   | brain                  |                  | 101 |
| Spinocerebellar ataxia 6                                                                  | CACNA1A | SYT1     | brain                  | heart, adrenal   | 5   |
| Spinocerebellar ataxia 6                                                                  | CACNA1A | CABP1    | brain                  | heart            | 5   |
| Spinocerebellar ataxia 6                                                                  | CACNA1A | CACNB4   | brain                  | heart, adrenal   | 5   |
| Supranuclear palsy                                                                        | MAPT    | SLC1A2   | brain                  | liver            | 31  |



|                                                             |        |           |         |                        |     |
|-------------------------------------------------------------|--------|-----------|---------|------------------------|-----|
| progressive                                                 |        |           |         |                        |     |
| Supranuclear palsy progressive                              | MAPT   | SLC1A2    | brain   | liver                  | 31  |
| Supravalvar aortic stenosis                                 | ELN    | FBN2      | heart   | testis, adipose        | 9   |
| Syndactyly type III                                         | GJA1   | GJA3      | heart   | kidney, testis         | 10  |
| Tetrology of Fallot                                         | NKX2-5 | TBX5      | heart   | thyroid                | 7   |
| Tetrology of Fallot                                         | NKX2-5 | CAMTA2    | heart   | thyroid                | 7   |
| Tetrology of Fallot                                         | NKX2-5 | ID2       | heart   | thyroid                | 7   |
| Tetrology of Fallot                                         | NKX2-5 | HDAC1     | heart   | thyroid                | 7   |
| Tetrology of Fallot                                         | NKX2-5 | ID3       | heart   | thyroid                | 7   |
| Tetrology of Fallot                                         | NKX2-5 | ID1       | heart   | thyroid                | 7   |
| Tetrology of Fallot                                         | NKX2-5 | GATA4     | heart   | thyroid                | 7   |
| Thanatophoric dysplasia type I,II                           | FGFR3  | FGF9      | brain   |                        | 22  |
| Thanatophoric dysplasia type I,II                           | FGFR3  | FGF9      | brain   |                        | 22  |
| Thanatophoric dysplasia type I,II                           | FGFR3  | FGF1      | brain   | colon                  | 22  |
| Thanatophoric dysplasia type I,II                           | FGFR3  | FGF1      | brain   | colon                  | 22  |
| Thanatophoric dysplasia type I,II                           | FGFR3  | CTSK      | brain   | skin, adrenal          | 22  |
| Thanatophoric dysplasia type I,II                           | FGFR3  | CTSK      | brain   | skin, adrenal          | 22  |
| Warfarin sensitivity                                        | CYP2C9 | CDC37     | liver   | colon, small intestine | 2   |
| Warfarin sensitivity                                        | CYP2C9 | POR       | liver   | colon, small intestine | 2   |
| Adenomatous polyposis coli; Turcot syndrome                 | APC    | DLGAP1    | brain   | testis                 | 193 |
| Adenomatous polyposis coli; Turcot syndrome                 | APC    | PAK3      | brain   | thyroid, testis        | 193 |
| Ataxia-telangiectasia                                       | ATM    | TERF1     | wbc     | brain                  | 61  |
| Bloom Syndrome                                              | BLM    | TERF1     | wbc     | brain                  | 32  |
| Hereditary breast/ovarian cancer                            | BRCA1  | ESR1      | breast  |                        | 152 |
| Hereditary breast/ovarian cancer                            | BRCA1  | HIST1H4 E | ovary   | brain, prostate        | 158 |
| familial breast cancer                                      | CHEK2  | GINS2     | adrenal | testis                 | 26  |
| Familial lung cancer                                        | EGFR   | ROS1      | lung    | prostate, kidney       | 291 |
| Familial lung cancer                                        | EGFR   | ZAP70     | lung    | Lymph node, adrenal    | 291 |
| Familial lung cancer                                        | EGFR   | EREG      | lung    |                        | 291 |
| Familial lung cancer                                        | EGFR   | KRT1      | lung    | adipose                | 291 |
| Familial lung cancer                                        | EGFR   | KRT6A     | lung    | thyroid, adipose       | 291 |
| Hereditary non-polyposis colorectal cancer, Turcot syndrome | MLH1   | PTPRH     | colon   | liver                  | 132 |
| Hereditary non-polyposis colorectal cancer, Turcot          | MLH1   | MUC2      | colon   | thyroid                | 132 |

|                                                             |      |         |                |                  |     |
|-------------------------------------------------------------|------|---------|----------------|------------------|-----|
| syndrome                                                    |      |         |                |                  |     |
| Hereditary non-polyposis colorectal cancer                  | MSH2 | ESR2    | ovary          | testis, breast   | 31  |
| Hereditary non-polyposis colorectal cancer, Turcot syndrome | PMS2 | PSD2    | brain          |                  | 37  |
| Familial retinoblastoma                                     | RB1  | GATA1   | lung           | testis, prostate | 127 |
| Li-Fraumeni syndrome                                        | TP53 | PIN1    | adrenal, brain | testis, prostate | 328 |
| Li-Fraumeni syndrome                                        | TP53 | CITED1  | breast, brain  | thyroid, testis  | 306 |
| Li-Fraumeni syndrome                                        | TP53 | RASGRF1 | brain          |                  | 291 |
| Muscular Dystrophy                                          | DAG1 | CAV3    | skeletal       | heart, testis    | 14  |
