# Supplementary material for: Comparative Analysis of Human Tissue Interactomes Reveals Factors Leading to Tissue-Specific Manifestation of Hereditary Diseases
Source: PubMed Central journal article supplement (PMC4055280; doi:10.1371/journal.pcbi.1003632), 2014-06-12
Supplement: pcbi.1003632.s018.pdf [file pcbi.1003632.s018.pdf]

**Table S10: Consolidation of tissues from the different datasets into 16 main tissues.** Brackets group together samples from similar or closely-related sub-tissues.

The name of the dataset appears after the '@' sign.

| <b>Tissue Group</b>            | <b>Tissue samples from different data sources</b>                                                                                                                                                                                                                                                                                                                                                                                                                                                                                                                       |
|--------------------------------|-------------------------------------------------------------------------------------------------------------------------------------------------------------------------------------------------------------------------------------------------------------------------------------------------------------------------------------------------------------------------------------------------------------------------------------------------------------------------------------------------------------------------------------------------------------------------|
| <b>Adipose</b>                 | (Adipocyte@GNF;adipose@bodymap )                                                                                                                                                                                                                                                                                                                                                                                                                                                                                                                                        |
| <b>Adrenal</b>                 | AdrenalCortex@GNF<br>(Adrenalgland@GNF; Adrenal gland- glandular cells@HPA; adrenal@bodymap)                                                                                                                                                                                                                                                                                                                                                                                                                                                                            |
| <b>Brain</b>                   | (Wholebrain@GNF; brain@bodymap )<br>(Cerebellum - Cells in granular layer@HPA; Cerebellum - Cells in molecular layer@HPA; Cerebellum - Purkinje cells@HPA; Cerebellum@GNF )<br>(PrefrontalCortex@GNF;TemporalLobe@GNF; Cerebral cortex - Glial cells@HPA; Cerebral cortex - Neuronal cells@HPA; Lateral ventricle - Glial cells@HPA; Lateral ventricle - Neuronal cells@HPA; PrefrontalCortex@GNF )<br>(Amygdala@GNF; CiliaryGanglion@GNF; CingulateCortex@GNF; Hypothalamus@GNF; Hippocampus - Glial cells@HPA; Hippocampus - Neuronal cells@HPA; Caudatenucleus@GNF ) |
| <b>Breast</b>                  | (breast@bodymap, Breast - Glandular cells@HPA )                                                                                                                                                                                                                                                                                                                                                                                                                                                                                                                         |
| <b>Colon</b>                   | (colon@GNF; colon@bodymap); Colon - Glandular cells@HPA                                                                                                                                                                                                                                                                                                                                                                                                                                                                                                                 |
| <b>Heart</b>                   | (CardiacMyocytes@GNF; Heart muscle - Myocytes@HPA); (Heart@GNF; heart@bodymap); AtrioventricularNode@GNF                                                                                                                                                                                                                                                                                                                                                                                                                                                                |
| <b>Kidney</b>                  | (Kidney@GNF; Kidney@bodymap); Kidney - Cells in glomeruli@HPA; Kidney - Cells in tubules@HPA                                                                                                                                                                                                                                                                                                                                                                                                                                                                            |
| <b>Liver</b>                   | Liver - Bile duct cells@HPA; (Liver@GNF; Liver@bodymap);Liver - Hepatocytes@HPA                                                                                                                                                                                                                                                                                                                                                                                                                                                                                         |
| <b>Lung</b>                    | (Lung@GNF;lung@bodymap); Lung - Pneumocytes@HPA; Lung - Macrophages@HPA                                                                                                                                                                                                                                                                                                                                                                                                                                                                                                 |
| <b>Lymph Node</b>              | Lymph node - Germinal center cells@HPA; (Lymphnode@GNF; LymphNode@bodymap); Lymph node - Non-germinal center cells@HPA                                                                                                                                                                                                                                                                                                                                                                                                                                                  |
| <b>Ovary</b>                   | (Ovary@GNF; ovary@bodymap); Ovary - Ovarian stroma cells@HPA; Ovary - Follicle cells@HPA                                                                                                                                                                                                                                                                                                                                                                                                                                                                                |
| <b>Prostate</b>                | (Prostate@GNF; Prostate@bodymap); Prostate - Glandular cells@HPA                                                                                                                                                                                                                                                                                                                                                                                                                                                                                                        |
| <b>Skeletal muscle</b>         | (SkeletalMuscle@GNF; Skeletal muscle - Myocytes@HPA; Muscle@bodymap)                                                                                                                                                                                                                                                                                                                                                                                                                                                                                                    |
| <b>Testis</b>                  | (Testis@GNF;testes@bodymap); TestisGermCell@GNF; TestisInterstitial@GNF; (TestisSeminiferousTubule@GNF; Testis - Cells in seminiferous ducts@HPA); (TestisLeydigCell@GNF; Testis - Leydig cells@HPA )                                                                                                                                                                                                                                                                                                                                                                   |
| <b>Thyroid</b>                 | (Thyroid@GNF; Thyroid@bodymap); Thyroid gland - Glandular cells@HPA                                                                                                                                                                                                                                                                                                                                                                                                                                                                                                     |
| <b>White Blood Cells (WBC)</b> | (721_B_lymphoblasts@GNF; CD19+_BCells(neg._sel.)@GNF; CD56+_NKCells@GNF; CD4+_Tcells@GNF; CD8+_Tcells@GNF; (BDCA4+_DentriticCells@GNF; CD14+_Monocytes@GNF;CD33+_Myeloid@GNF); Wbc@bodymap;                                                                                                                                                                                                                                                                                                                                                                             |
