# Supplementary material for: Comparative Analysis of Human Tissue Interactomes Reveals Factors Leading to Tissue-Specific Manifestation of Hereditary Diseases
Source: PubMed Central journal article supplement (PMC4055280; doi:10.1371/journal.pcbi.1003632), 2014-06-12
Supplement: pcbi.1003632.s019.pdf [file pcbi.1003632.s019.pdf]

**Table S11: The distribution of the number of PPIs across 1-16 tissues.**

| <b>Number of tissues</b> | <b>Number of PPIs</b> |
|--------------------------|-----------------------|
| 1                        | 3,357                 |
| 2                        | 1,931                 |
| 3                        | 2,015                 |
| 4                        | 1,666                 |
| 5                        | 1,333                 |
| 6                        | 1,215                 |
| 7                        | 1,126                 |
| 8                        | 1,043                 |
| 9                        | 1,241                 |
| 10                       | 1,407                 |
| 11                       | 1,668                 |
| 12                       | 1,823                 |
| 13                       | 2,629                 |
| 14                       | 4,234                 |
| 15                       | 6,582                 |
| 16                       | 26,370                |
