# Supplementary material for: Comparative Analysis of Human Tissue Interactomes Reveals Factors Leading to Tissue-Specific Manifestation of Hereditary Diseases
Source: PubMed Central journal article supplement (PMC4055280; doi:10.1371/journal.pcbi.1003632), 2014-06-12
Supplement: pcbi.1003632.s020.pdf [file pcbi.1003632.s020.pdf]

**Table S12: The numbers of genes and PPIs in the interactome of each tissue.**

| <b>Tissue</b>     | <b>Number of genes</b> | <b>Number of PPIs</b> |
|-------------------|------------------------|-----------------------|
| Adipose           | 7,129                  | 40,874                |
| Adrenal           | 8,555                  | 49,973                |
| Brain             | 8,611                  | 48,788                |
| Breast            | 7,860                  | 42,891                |
| Colon             | 8,243                  | 47,057                |
| Heart             | 7,889                  | 44,162                |
| Kidney            | 8,342                  | 46,926                |
| Liver             | 7,299                  | 39,651                |
| Lung              | 8,539                  | 48,653                |
| Lymph Node        | 8,227                  | 47,330                |
| Ovary             | 7,859                  | 43,718                |
| Prostate          | 8,389                  | 48,292                |
| Skeletal Muscle   | 7,480                  | 42,759                |
| Testis            | 8,898                  | 50,902                |
| Thyroid           | 8,325                  | 47,614                |
| White Blood Cells | 7,064                  | 40,069                |
