# Supplementary material for: Comparative Analysis of Human Tissue Interactomes Reveals Factors Leading to Tissue-Specific Manifestation of Hereditary Diseases
Source: PubMed Central journal article supplement (PMC4055280; doi:10.1371/journal.pcbi.1003632), 2014-06-12
Supplement: pcbi.1003632.s021.pdf [file pcbi.1003632.s021.pdf]

**Table S13: The distribution of the number of causal genes expressed in 1-16 tissues.**

| <b>Number of tissues</b> | <b>Number of expressed casual genes</b> |
|--------------------------|-----------------------------------------|
| 1                        | 8                                       |
| 2                        | 9                                       |
| 3                        | 6                                       |
| 4                        | 7                                       |
| 5                        | 9                                       |
| 6                        | 4                                       |
| 7                        | 6                                       |
| 8                        | 1                                       |
| 9                        | 9                                       |
| 10                       | 6                                       |
| 11                       | 5                                       |
| 12                       | 16                                      |
| 13                       | 15                                      |
| 14                       | 23                                      |
| 15                       | 24                                      |
| 16                       | 85                                      |
