# Supplementary material for: Comparative Analysis of Human Tissue Interactomes Reveals Factors Leading to Tissue-Specific Manifestation of Hereditary Diseases
Source: PLOS journal article supplement (doi:10.1371/journal.pcbi.1003632), 2014-06-12

**Figure S5: Tissue-association of hereditary diseases, their causal genes, and the disease-to-gene associations per tissue.** All tissues manifest at least one hereditary disease.

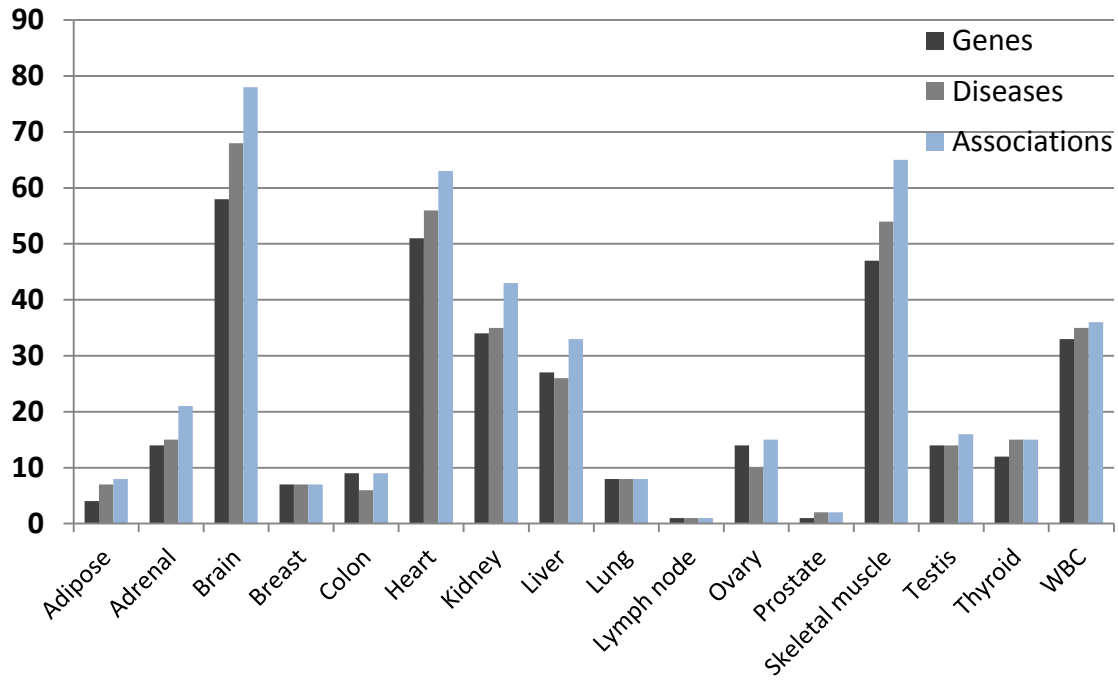

Supplement: S5 (10.1371/journal.pcbi.1003632.s005) [file journal.pcbi.1003632.s005]
