# Supplementary material for: Comparative Analysis of Human Tissue Interactomes Reveals Factors Leading to Tissue-Specific Manifestation of Hereditary Diseases
Source: PLOS journal article supplement (doi:10.1371/journal.pcbi.1003632), 2014-06-12
Supplement: S17 (10.1371/journal.pcbi.1003632.s017) [file journal.pcbi.1003632.s017]

**Table S9: Overview of the numbers of genes and tissues measured in each dataset.**

|                                             | <b>GNF<br/>(transcript)</b> | <b>HPA<br/>(protein)</b> | <b>RNA-seq<br/>(transcript)</b> |
|---------------------------------------------|-----------------------------|--------------------------|---------------------------------|
| Measured objects                            | 26,560<br>probe-sets        | 13,150<br>antibodies     | N/A                             |
| ENSEMBL genes mapped to<br>measured objects | 16,052                      | 10,100                   | 24,433                          |
| Genes expressed (threshold)                 | 10,651<br>( $\geq 100$ )    | 8,967<br>(see Methods)   | 18,399<br>( $\geq 1$ )          |
| Protein-coding genes expressed              | 9,279                       | 8,967                    | 14,909                          |
| Profiled tissues                            | 78                          | 66                       | 16                              |
